# Supplementary material for: Palliative care integration indicators: an European regional analysis
Source: HighWire-hosted journal article supplement (doi:10.1136/bmjspcare-2021-003181), 2021-09-13
Supplement: bmjspcare-2021-003181supp001_data_supplement.pdf [file bmjspcare-2021-003181supp001_data_supplement.pdf]

## Annex 1. Primary data of the EAPC Atlas of Palliative Care in Europe 2019 on integration of palliative care(1)

| Country            | Pediatrics |      |          | Cardiology               |                             |                  |                      | Oncology                |                    |                          | Primary Palliative Care                      |              |                                            |                     | Long-term care facilities |                        |                       |       | Volunteering       |             |                           |                |
|--------------------|------------|------|----------|--------------------------|-----------------------------|------------------|----------------------|-------------------------|--------------------|--------------------------|----------------------------------------------|--------------|--------------------------------------------|---------------------|---------------------------|------------------------|-----------------------|-------|--------------------|-------------|---------------------------|----------------|
|                    | Hospice    | Home | Hospital | Cardio. service doing PC | PC topics Cardio.congresses | Cardio & PC meet | PC Publis cardio (*) | Int. centers Onco & PC. | Early integr. Onco | Publis integr. PC & Onco | % PC patients identif. 1 <sup>st</sup> level | Incents (**) | Off. policy docs 1 <sup>st</sup> PC (****) | Off. PC regul. docs | PC training               | Publis on PC provision | Collab. with PC teams | Funds | Vol. hospices orgs | N° PC vols. | Systems to track PC vols. | Training vols. |
| Austria            | 1          | 14   | 2        |                          |                             |                  |                      | 4                       | 0                  | 3                        |                                              |              |                                            | Yes                 | 20-40%                    | Yes                    | (4)                   | Yes   | 184                | >1000       | Yes                       | Yes            |
| Belgium            | 0          | 6    | 3        |                          |                             |                  |                      | 9                       | 1                  | 12                       | 1-20%                                        |              | L                                          | Yes                 | 40-60%                    | Yes                    | (4)                   | Yes   | 84                 | >1000       | No                        | Yes            |
| Czech Republic     | 0          | 6    | 2        | Yes                      | Yes                         | No               | Yes                  | 1                       | 0                  | 0                        | 1-20%                                        |              | P                                          |                     | <20%                      | No                     | (2)                   | Yes   | 12                 | 100-500     | Yes                       | Yes            |
| Germany            | 16         | 33   | 4        | No                       | Yes                         | No               | NK                   | 24                      | 1                  | 43                       | 41-60%                                       | (1, 2)       | L/P                                        | Yes                 | 20-40%                    | Yes                    | (3)                   | Yes   | 1316               | >1000       | No                        | Yes            |
| Hungary            | 2          | 3    | 1        |                          |                             |                  |                      | 1                       | 0                  | 3                        | 21-40%                                       |              | L                                          |                     |                           |                        |                       |       | 5                  | 100-500     | No                        | Yes            |
| Netherlands        | 13         | 22   | 7        | Yes                      | Yes                         | No               | Yes                  | 14                      | 0                  | 10                       | 41-60%                                       | (1,2)        | L/P                                        | Yes                 | 60-90%                    | Yes                    | (3)                   | Yes   | 91                 | >1000       | Yes                       | Yes            |
| Poland             | 8          | 66   | 0        |                          |                             |                  |                      | 1                       | 0                  | 1                        | 61-80%                                       |              | L                                          |                     | 60-90%                    | Yes                    | (3)                   | Yes   | 20                 | >1000       | Yes                       | Yes            |
| Serbia             | 0          | 0    | 1        |                          |                             |                  |                      | 0                       | 0                  | 0                        | 1-20%                                        | (2, 3)       | L                                          |                     |                           |                        |                       |       | 1                  | 100-500     | Yes                       | Yes            |
| Switzerland        | 0          | 0    | 3        | No                       | Yes                         | NK               | NK                   | 4                       | 3                  | 13                       | 21-40%                                       |              | P                                          | Yes                 | 40-60%                    | No                     | (3)                   |       | 30                 | 500-1000    | No                        | Yes            |
| Albania            | 0          | 3    | 1        | No                       | No                          | No               | NK                   | 0                       | 0                  | 0                        | 1-20%                                        |              | L                                          |                     |                           |                        |                       |       |                    |             | No                        | N/S            |
| Armenia            | 0          | 1    |          |                          |                             |                  |                      | 0                       | 0                  | 0                        |                                              | (1,2)        | L/P                                        |                     |                           | No                     | (1)                   | No    | 0                  | 0-10        |                           |                |
| Belarus            | 13         | 8    | 0        |                          |                             |                  |                      | 0                       | 0                  | 0                        |                                              |              |                                            |                     |                           |                        |                       |       |                    |             |                           |                |
| Cyprus             | 0          | 0    | 0        |                          |                             |                  |                      | 0                       | 0                  | 3                        | 41-60%                                       |              |                                            |                     |                           |                        |                       |       |                    |             |                           |                |
| Denmark            | 1          | 5    | 10       | Yes                      | Yes                         | No               | Yes                  | 1                       | 1                  | 1                        | 21-40%                                       |              | P                                          | Yes                 |                           | Yes                    | (3)                   | Yes   |                    |             |                           |                |
| Estonia            | 0          | 0    | 0        |                          |                             |                  |                      | 1                       | 0                  | 0                        |                                              |              |                                            |                     |                           |                        |                       |       |                    |             |                           |                |
| Finland            | 0          | 2    | 0        |                          |                             |                  |                      | 0                       | 0                  | 1                        | 61-80%                                       |              | P                                          |                     |                           |                        |                       |       |                    |             |                           |                |
| France             | 0          | 22   | 22       |                          |                             |                  |                      | 7                       | 5                  | 7                        |                                              |              | L/P                                        | Yes                 | 40-60%                    | Yes                    | (3)                   | Yes   | NA                 | >1000       | Yes                       | Yes            |
| Greece             | 0          | 1    | 0        |                          |                             |                  |                      | 2                       | 0                  | 0                        | 1-20%                                        |              |                                            |                     | <20%                      | No                     | (3)                   | No    |                    |             |                           |                |
| Ireland            | 1          | 10   | 4        | Yes                      | Yes                         | NK               | NK                   | 3                       | 0                  | 0                        | 1-20%                                        |              | P                                          |                     |                           |                        |                       |       |                    |             |                           |                |
| Israel             | 1          | 1    | 9        |                          |                             |                  |                      | 3                       | 0                  | 18                       |                                              |              |                                            |                     | <20%                      | Yes                    | (2)                   | No    |                    |             |                           |                |
| Kazakhstan         | 1          | 0    | 0        |                          |                             |                  |                      | 0                       | 0                  | 0                        | 81-100%                                      |              | L/P                                        |                     |                           |                        |                       |       |                    |             |                           |                |
| Latvia             | 0          | 2    | 2        |                          |                             |                  |                      | 0                       | 0                  | 0                        |                                              |              |                                            |                     |                           |                        |                       |       |                    |             |                           |                |
| Liechtenstein      | 0          | 0    | 0        |                          |                             |                  |                      | 0                       | 0                  | 0                        |                                              |              |                                            |                     |                           |                        |                       |       |                    |             |                           |                |
| Luxembourg         | 0          | 1    | 1        |                          |                             |                  |                      | 0                       | 0                  | 0                        | 41-60%                                       | (1)          | L                                          |                     |                           |                        |                       |       |                    |             |                           |                |
| Malta              | 0          | 0    | 0        |                          |                             |                  |                      | 0                       | 0                  | 0                        | 1-20%                                        |              | P                                          |                     |                           |                        |                       |       |                    |             |                           |                |
| Moldova            | 1          | 1    | 2        |                          |                             |                  |                      | 0                       | 0                  | 0                        | 41-60%                                       |              | L/P                                        |                     |                           |                        |                       |       |                    |             |                           |                |
| Norway             | 0          | 0    | 0        |                          |                             |                  |                      | 2                       | 1                  | 7                        | 41-60%                                       |              | P                                          |                     |                           |                        |                       |       |                    |             |                           |                |
| Portugal           | 0          | 5    | 6        | Yes                      | Yes                         | No               | Yes                  | 7                       | 0                  | 0                        | 1-20%                                        |              | L/P                                        |                     |                           |                        |                       |       |                    |             | No                        | Yes            |
| Romania            | 3          | 4    | 5        |                          |                             |                  |                      | 2                       | 1                  | 1                        |                                              |              | L                                          |                     |                           |                        |                       |       | NA                 | 500-1000    | Yes                       | Yes            |
| Russian Federation | 14         | 0    | 0        |                          |                             |                  |                      | 1                       | 0                  | 0                        |                                              |              |                                            |                     | <20%                      | No                     | (2)                   | No    |                    |             |                           |                |
| Slovak Republic    | 0          | 4    | 2        |                          |                             |                  |                      | 0                       | 0                  | 0                        |                                              |              |                                            |                     |                           |                        |                       |       |                    |             |                           |                |
| Spain              | 0          | 8    | 2        | Yes                      | Yes                         | Yes              | Yes                  | 15                      | 0                  | 8                        | 81-100%                                      | (1)          | L/P                                        | Yes                 | 20-40%                    | No                     | (3)                   | No    |                    |             |                           |                |
| Tajikistan         | 0          | 0    | 2        |                          |                             |                  |                      | 0                       | 0                  | 0                        | 1-20%                                        |              | L/P                                        |                     |                           |                        |                       | No    |                    |             |                           |                |
| Turkey             | 1          | 0    | 4        |                          |                             |                  |                      | 3                       | 0                  | 6                        | 1-20%                                        |              | L/P                                        |                     |                           |                        |                       |       |                    |             |                           |                |
| Ukraine            | 3          | 6    | 3        |                          |                             |                  |                      | 0                       | 0                  | 0                        | 1-20%                                        |              | L                                          |                     |                           |                        |                       |       |                    |             |                           |                |
| United Kingdom     | 45         | 45   | 8        | Yes                      | Yes                         | Yes              | Yes                  | 8                       | 1                  | 13                       | 41-60%                                       | (1,2)        | P                                          | Yes                 | 60-90%                    | Yes                    | (3)                   | Yes   | NA                 | >1000       | Yes                       | Yes            |

| Country                | Pediatrics |      |          | Cardiology               |                              |                  |                      | Oncology                |                    |                          | Primary Palliative Care                      |              |                                            | Long-term care facilities |             |                        |                       |       | Volunteering       |             |                           |                |  |
|------------------------|------------|------|----------|--------------------------|------------------------------|------------------|----------------------|-------------------------|--------------------|--------------------------|----------------------------------------------|--------------|--------------------------------------------|---------------------------|-------------|------------------------|-----------------------|-------|--------------------|-------------|---------------------------|----------------|--|
|                        | Hospice    | Home | Hospital | Cardio. service doing PC | PC topics Cardio. congresses | Cardio & PC meet | PC Publis cardio (*) | Int. centers Onco & PC. | Early integr. Onco | Publis integr. PC & Onco | % PC patients identif. 1 <sup>st</sup> level | Incents (**) | Off. policy docs 1 <sup>st</sup> PC (****) | Off. PC regul. docs       | PC training | Publis on PC provision | Collab. with PC teams | Funds | Vol. hospices orgs | N° PC vols. | Systems to track PC vols. | Training vols. |  |
| Georgia                | 1          | 4    |          |                          |                              |                  |                      | 0                       | 0                  | 0                        |                                              |              |                                            |                           |             |                        |                       |       |                    |             |                           |                |  |
| Italy                  | 5          | 7    |          | No                       | Yes                          | Yes              | Yes                  | 39                      | 4                  | 16                       | 1-20%                                        |              | L                                          | Yes                       | <20%        | Yes                    | (2)                   | Yes   | NA                 | >1000       | No                        | Yes            |  |
| Kyrgyz Republic        | 1          | 1    |          |                          |                              |                  |                      | 0                       | 0                  | 0                        | 1-20%                                        | (1,3,4)      | L/P                                        | Yes                       | 60-90%      | Yes                    | (5)                   | Yes   |                    |             |                           |                |  |
| Lithuania              | 0          |      | 3        |                          |                              |                  |                      | 0                       | 0                  | 0                        |                                              |              |                                            | Yes                       | >90%        | Yes                    | (5)                   | Yes   |                    |             |                           |                |  |
| Slovenia               | 0          |      | 10       |                          |                              |                  |                      | 2                       | 0                  | 1                        | 1-20%                                        |              | L/P                                        |                           |             |                        |                       |       |                    |             |                           |                |  |
| Sweden                 | 1          |      | 0        | Yes                      | Yes                          | NK               | NK                   | 0                       | 1                  | 1                        | 21-40%                                       |              | P                                          |                           |             |                        |                       |       |                    |             |                           |                |  |
| Bosnia and Herzegovina | 1          |      |          |                          |                              |                  |                      | 0                       | 0                  | 0                        |                                              |              |                                            |                           |             |                        |                       |       |                    |             |                           |                |  |
| Bulgaria               | 0          |      |          |                          |                              |                  |                      | 1                       | 0                  | 0                        | 1-20%                                        |              |                                            |                           |             |                        |                       |       |                    |             |                           |                |  |
| Croatia                |            |      |          |                          |                              |                  |                      | 0                       | 0                  | 0                        | 1-20%                                        |              | L/P                                        |                           |             |                        |                       |       |                    |             |                           |                |  |

(\*) NK: Not known; (\*\*) Incentives to the identification of PC patients: (1) Monetary incentives (2) Academic or curricular recognition (3) Time incentives (free days, extra hours and early leaves); (4) Work retributions; (\*\*\*\*) L: Law; P: Plan (\*\*\*\*\*): 1: never; 2: very rarely; 3: some times; 4: most of the time; 5 always

**Annex 2.** Converted data into scores per each integration indicator.

| Country            | Pediatrics |      |          | Cardiology              |                              |                  |                      | Oncology                |                    |                          | Primary Palliative Care                       |              |                                             | Long-term care facilities |             |                     |                       |       | Volunteering       |             |                           |                | ICS |
|--------------------|------------|------|----------|-------------------------|------------------------------|------------------|----------------------|-------------------------|--------------------|--------------------------|-----------------------------------------------|--------------|---------------------------------------------|---------------------------|-------------|---------------------|-----------------------|-------|--------------------|-------------|---------------------------|----------------|-----|
|                    | Hospice    | Home | Hospital | Cardio.service doing PC | PC topics Cardio. congresses | Cardio & PC meet | PC Publis cardio (*) | Int. centers Onco & PC. | Early integr. Onco | Publis integr. PC & Onco | % PC patients identif. 1 <sup>ary</sup> level | Incents (**) | Off. policy docs 1 <sup>ary</sup> PC (****) | Off. PC regul. docs       | PC training | Publis PC provision | Collab. with PC teams | Funds | Vol. hospices orgs | N° PC vols. | Systems to track PC vols. | Training vols. |     |
| Netherlands        | 3          | 3    | 3        | 2                       | 2                            | 1                | 2                    | 3                       | 1                  | 2                        | 3                                             | 2            | 2                                           | 2                         | 3           | 2                   | 3                     | 2     | 3                  | 3           | 2                         | 2              | 51  |
| United Kingdom     | 3          | 3    | 2        | 2                       | 2                            | 2                | 2                    | 2                       | 2                  | 2                        | 2                                             | 2            | 2                                           | 2                         | 3           | 2                   | 3                     | 2     | 1                  | 2           | 2                         | 2              | 47  |
| Germany            | 3          | 2    | 2        | 1                       | 2                            | 1                | 1                    | 2                       | 2                  | 2                        | 2                                             | 2            | 2                                           | 2                         | 2           | 2                   | 3                     | 2     | 3                  | 2           | 1                         | 2              | 43  |
| Switzerland        | 1          | 1    | 3        | 1                       | 2                            | 1                | 1                    | 3                       | 2                  | 2                        | 3                                             | 0            | 2                                           | 2                         | 3           | 1                   | 3                     | 0     | 3                  | 3           | 1                         | 2              | 40  |
| Belgium            | 1          | 3    | 2        | 0                       | 0                            | 0                | 0                    | 3                       | 2                  | 2                        | 2                                             | 0            | 2                                           | 2                         | 3           | 2                   | 3                     | 2     | 3                  | 3           | 1                         | 2              | 38  |
| Czech Republic     | 1          | 3    | 2        | 2                       | 2                            | 1                | 2                    | 2                       | 1                  | 1                        | 2                                             | 0            | 2                                           | 0                         | 2           | 1                   | 2                     | 2     | 2                  | 2           | 2                         | 2              | 36  |
| Denmark            | 3          | 3    | 3        | 2                       | 2                            | 1                | 2                    | 2                       | 2                  | 2                        | 3                                             | 0            | 2                                           | 2                         | 0           | 2                   | 3                     | 2     | 0                  | 0           | 0                         | 0              | 36  |
| Italy              | 2          | 2    | 0        | 1                       | 2                            | 2                |                      | 3                       | 2                  | 2                        | 2                                             | 0            | 2                                           | 2                         | 2           | 2                   | 2                     | 2     | 1                  | 2           | 1                         | 2              | 36  |
| Poland             | 3          | 3    | 1        | 0                       | 0                            | 0                | 0                    | 2                       | 1                  | 2                        | 3                                             | 0            | 2                                           | 0                         | 3           | 2                   | 3                     | 2     | 2                  | 2           | 2                         | 2              | 35  |
| Spain              | 1          | 2    | 2        | 2                       | 2                            | 2                | 2                    | 3                       | 1                  | 2                        | 3                                             | 2            | 2                                           | 2                         | 2           | 1                   | 3                     | 1     | 0                  | 0           | 0                         | 0              | 35  |
| Austria            | 2          | 3    | 2        | 0                       | 0                            | 0                | 0                    | 3                       | 1                  | 2                        | 0                                             | 0            | 0                                           | 2                         | 2           | 2                   | 3                     | 2     | 3                  | 3           | 2                         | 2              | 34  |
| France             | 1          | 2    | 3        | 0                       | 0                            | 0                | 0                    | 2                       | 2                  | 2                        | 0                                             | 0            | 2                                           | 2                         | 3           | 2                   | 3                     | 2     | 1                  | 2           | 2                         | 2              | 33  |
| Kyrgyz Republic    | 2          | 2    | 0        | 0                       | 0                            | 0                | 0                    | 1                       | 1                  | 1                        | 3                                             | 2            | 2                                           | 2                         | 3           | 2                   | 3                     | 2     | 0                  | 0           | 0                         | 0              | 26  |
| Hungary            | 3          | 2    | 2        | 0                       | 0                            | 0                | 0                    | 2                       | 1                  | 2                        | 3                                             | 0            | 2                                           | 0                         | 0           | 0                   | 0                     | 0     | 2                  | 3           | 1                         | 2              | 25  |
| Ireland            | 3          | 3    | 3        | 2                       | 2                            | 1                | 1                    | 3                       | 1                  | 1                        | 3                                             | 0            | 2                                           | 0                         | 0           | 0                   | 0                     | 0     | 0                  | 0           | 0                         | 0              | 25  |
| Portugal           | 1          | 2    | 3        | 2                       | 2                            | 1                | 2                    | 3                       | 1                  | 1                        | 2                                             | 0            | 2                                           | 0                         | 0           | 0                   | 0                     | 0     | 0                  | 0           | 1                         | 2              | 25  |
| Serbia             | 1          | 1    | 2        | 0                       | 0                            | 0                | 0                    | 1                       | 1                  | 1                        | 3                                             | 2            | 2                                           | 0                         | 0           | 0                   | 0                     | 0     | 2                  | 3           | 2                         | 2              | 23  |
| Albania            | 1          | 3    | 3        | 1                       | 1                            | 1                | 1                    | 1                       | 1                  | 1                        | 3                                             | 0            | 2                                           | 0                         | 0           | 0                   | 0                     | 0     | 0                  | 0           | 1                         | 1              | 21  |
| Romania            | 2          | 2    | 2        | 0                       | 0                            | 0                | 0                    | 2                       | 2                  | 2                        | 0                                             | 0            | 2                                           | 0                         | 0           | 0                   | 0                     | 0     | 1                  | 2           | 2                         | 2              | 21  |
| Israel             | 2          | 2    | 3        | 0                       | 0                            | 0                | 0                    | 3                       | 1                  | 2                        | 0                                             | 0            | 0                                           | 0                         | 2           | 2                   | 2                     | 1     | 0                  | 0           | 0                         | 0              | 20  |
| Lithuania          | 1          | 0    | 3        | 0                       | 0                            | 0                | 0                    | 1                       | 1                  | 1                        | 0                                             | 0            | 0                                           | 2                         | 3           | 2                   | 3                     | 2     | 0                  | 0           | 0                         | 0              | 19  |
| Sweden             | 2          | 0    | 1        | 2                       | 2                            | 1                | 1                    | 1                       | 2                  | 2                        | 3                                             | 0            | 2                                           | 0                         | 0           | 0                   | 0                     | 0     | 0                  | 0           | 0                         | 0              | 19  |
| Armenia            | 1          | 2    | 0        | 0                       | 0                            | 0                | 0                    | 1                       | 1                  | 1                        | 0                                             | 2            | 2                                           | 0                         | 0           | 1                   | 2                     | 1     | 0                  | 3           | 0                         | 0              | 17  |
| Greece             | 1          | 2    | 1        | 0                       | 0                            | 0                | 0                    | 2                       | 1                  | 1                        | 2                                             | 0            | 0                                           | 0                         | 2           | 1                   | 3                     | 1     | 0                  | 0           | 0                         | 0              | 17  |
| Luxembourg         | 1          | 3    | 3        | 0                       | 0                            | 0                | 0                    | 1                       | 1                  | 1                        | 3                                             | 2            | 2                                           | 0                         | 0           | 0                   | 0                     | 0     | 0                  | 0           | 0                         | 0              | 17  |
| Norway             | 1          | 1    | 1        | 0                       | 0                            | 0                | 0                    | 3                       | 2                  | 2                        | 3                                             | 0            | 2                                           | 0                         | 0           | 0                   | 0                     | 0     | 0                  | 0           | 0                         | 0              | 15  |
| Slovenia           | 1          | 0    | 3        | 0                       | 0                            | 0                | 0                    | 3                       | 1                  | 2                        | 3                                             | 0            | 2                                           | 0                         | 0           | 0                   | 0                     | 0     | 0                  | 0           | 0                         | 0              | 15  |
| Moldova            | 3          | 2    | 3        | 0                       | 0                            | 0                | 0                    | 1                       | 1                  | 1                        | 3                                             | 0            | 0                                           | 0                         | 0           | 0                   | 0                     | 0     | 0                  | 0           | 0                         | 0              | 14  |
| Russian Federation | 2          | 1    | 1        | 0                       | 0                            | 0                | 0                    | 2                       | 1                  | 1                        | 0                                             | 0            | 0                                           | 0                         | 2           | 1                   | 2                     | 1     | 0                  | 0           | 0                         | 0              | 14  |
| Turkey             | 2          | 1    | 2        | 0                       | 0                            | 0                | 0                    | 2                       | 1                  | 2                        | 2                                             | 0            | 2                                           | 0                         | 0           | 0                   | 0                     | 0     | 0                  | 0           | 0                         | 0              | 14  |
| Finland            | 1          | 2    | 1        | 0                       | 0                            | 0                | 0                    | 1                       | 1                  | 2                        | 3                                             | 0            | 2                                           | 0                         | 0           | 0                   | 0                     | 0     | 0                  | 0           | 0                         | 0              | 13  |
| Tajikistan         | 1          | 1    | 2        | 0                       | 0                            | 0                | 0                    | 1                       | 1                  | 1                        | 3                                             | 0            | 2                                           | 0                         | 0           | 0                   | 0                     | 1     | 0                  | 0           | 0                         | 0              | 13  |

|                        |   |   |   |   |   |   |   |   |   |   |   |   |   |   |   |   |   |   |   |   |   |   |   |    |
|------------------------|---|---|---|---|---|---|---|---|---|---|---|---|---|---|---|---|---|---|---|---|---|---|---|----|
| Ukraine                | 2 | 2 | 2 | 0 | 0 | 0 | 0 | 1 | 1 | 1 | 2 | 0 | 2 | 0 | 0 | 0 | 0 | 0 | 0 | 0 | 0 | 0 | 0 | 13 |
| Kazakhstan             | 2 | 1 | 1 | 0 | 0 | 0 | 0 | 1 | 1 | 1 | 3 | 0 | 2 | 0 | 0 | 0 | 0 | 0 | 0 | 0 | 0 | 0 | 0 | 12 |
| Malta                  | 1 | 1 | 1 | 0 | 0 | 0 | 0 | 1 | 1 | 1 | 3 | 0 | 2 | 0 | 0 | 0 | 0 | 0 | 0 | 0 | 0 | 0 | 0 | 11 |
| Belarus                | 3 | 3 | 1 | 0 | 0 | 0 | 0 | 1 | 1 | 1 | 0 | 0 | 0 | 0 | 0 | 0 | 0 | 0 | 0 | 0 | 0 | 0 | 0 | 10 |
| Cyprus                 | 1 | 1 | 1 | 0 | 0 | 0 | 0 | 1 | 1 | 2 | 3 | 0 | 0 | 0 | 0 | 0 | 0 | 0 | 0 | 0 | 0 | 0 | 0 | 10 |
| Latvia                 | 1 | 3 | 3 | 0 | 0 | 0 | 0 | 1 | 1 | 1 | 0 | 0 | 0 | 0 | 0 | 0 | 0 | 0 | 0 | 0 | 0 | 0 | 0 | 10 |
| Slovak Republic        | 1 | 3 | 3 | 0 | 0 | 0 | 0 | 1 | 1 | 1 | 0 | 0 | 0 | 0 | 0 | 0 | 0 | 0 | 0 | 0 | 0 | 0 | 0 | 10 |
| Georgia                | 3 | 3 | 0 | 0 | 0 | 0 | 0 | 1 | 1 | 1 | 0 | 0 | 0 | 0 | 0 | 0 | 0 | 0 | 0 | 0 | 0 | 0 | 0 | 9  |
| Bulgaria               | 1 | 0 | 0 | 0 | 0 | 0 | 0 | 2 | 1 | 1 | 3 | 0 | 0 | 0 | 0 | 0 | 0 | 0 | 0 | 0 | 0 | 0 | 0 | 8  |
| Croatia                | 0 | 0 | 0 | 0 | 0 | 0 | 0 | 1 | 1 | 1 | 3 | 0 | 2 | 0 | 0 | 0 | 0 | 0 | 0 | 0 | 0 | 0 | 0 | 8  |
| Estonia                | 1 | 1 | 1 | 0 | 0 | 0 | 0 | 3 | 1 | 1 | 0 | 0 | 0 | 0 | 0 | 0 | 0 | 0 | 0 | 0 | 0 | 0 | 0 | 8  |
| Azerbaijan             | 1 | 1 | 1 | 0 | 0 | 0 | 0 | 1 | 1 | 1 | 0 | 0 | 0 | 0 | 0 | 0 | 0 | 0 | 0 | 0 | 0 | 0 | 0 | 6  |
| Bosnia and Herzegovina | 3 | 0 | 0 | 0 | 0 | 0 | 0 | 1 | 1 | 1 | 0 | 0 | 0 | 0 | 0 | 0 | 0 | 0 | 0 | 0 | 0 | 0 | 0 | 6  |
| Iceland                | 1 | 1 | 1 | 0 | 0 | 0 | 0 | 1 | 1 | 1 | 0 | 0 | 0 | 0 | 0 | 0 | 0 | 0 | 0 | 0 | 0 | 0 | 0 | 6  |
| Liechtenstein          | 1 | 1 | 1 | 0 | 0 | 0 | 0 | 1 | 1 | 1 | 0 | 0 | 0 | 0 | 0 | 0 | 0 | 0 | 0 | 0 | 0 | 0 | 0 | 6  |
| Macedonia, FYR         | 1 | 1 | 1 | 0 | 0 | 0 | 0 | 1 | 1 | 1 | 0 | 0 | 0 | 0 | 0 | 0 | 0 | 0 | 0 | 0 | 0 | 0 | 0 | 6  |
| Monaco                 | 1 | 1 | 1 | 0 | 0 | 0 | 0 | 1 | 1 | 1 | 0 | 0 | 0 | 0 | 0 | 0 | 0 | 0 | 0 | 0 | 0 | 0 | 0 | 6  |
| Montenegro             | 0 | 0 | 0 | 0 | 0 | 0 | 0 | 1 | 1 | 1 | 0 | 0 | 0 | 0 | 0 | 0 | 0 | 0 | 0 | 0 | 0 | 0 | 0 | 3  |
| Uzbekistan             | 0 | 0 | 0 | 0 | 0 | 0 | 0 | 1 | 1 | 1 | 0 | 0 | 0 | 0 | 0 | 0 | 0 | 0 | 0 | 0 | 0 | 0 | 0 | 3  |
